# Supplementary material
Source: HighWire-hosted journal article supplement (https://bjsm.bmj.com/content/51/16/1195)
Supplement: inline-supplementary-material-1 [file inline-supplementary-material-1.docx]

**Supplementary Table 1: Search Strategy for MEDLINE**

| **CONCEPT** | **KEYWORDS** | **MESH HEADING** |  |
| --- | --- | --- | --- |
| Patellofemoral | 1. Patellofemoral or patello-femoral or PFJ or patella.mp. | 3. Patella/ |  |
| 2. Knee compartment or knee joint or knee cap.mp. | 4. Knee joint/  5. Patellofemoral joint |  |
|  |  | 6. OR/1-5 |
|  |  |  |
| Osteoarthritis | 7. Osteoarthrit*.mp. | 10. Knee osteoarthritis/ |  |
| 8. OA.mp.  9. Bone marrow lesion |  |  |
|  |  | 11. OR/7-10 |
|  |  |  |
|  |  | 12. 6 AND 11. |
| Prevalence | 13. prevalence.mp. | 16. Prevalence/ |  |
| 14. Incidence.mp. | 17. Incidence/ |  |
| 15. Epidemolog*.mp. | 18. Morbidity/ |  |
|  |  |  |
|  |  | 19. OR/13-18 |
|  |  |  |
|  |  | 20. 12 AND 19 |
|  | Limit #1: English language |  |  |
